# Supplementary material for: Tropospheric Ozone Precursors: Global and Regional Distributions, Trends and Variability
Source: Copernicus journal article supplement (doi:10.5194/egusphere-2024-720), 2024-03-21
Supplement: Supplementary file 1 [file egusphere-2024-720-supplement.pdf]

## Supplemental Information

### Tropospheric Ozone Precursors: Global and Regional Distributions, Trends, and Variability

Yasin Elshorbany<sup>1</sup>, Jerald R. Ziemke<sup>2</sup>, Sarah Strode<sup>2,3</sup>, Hervé Petetin<sup>4</sup>, Kazuyuki Miyazaki<sup>5</sup>, Isabelle De Smedt<sup>6</sup>, Kenneth Pickering<sup>7</sup>, Rodrigo J. Seguel<sup>8</sup>, Helen Worden<sup>9</sup>, Tamara Emmerichs<sup>10</sup>, Domenico Taraborrelli<sup>10</sup>, Maria Cazorla<sup>11</sup>, Suvarna Fadnavis<sup>12</sup>, Rebecca R. Buchholz<sup>9</sup>, Benjamin Gaubert<sup>9</sup>, Néstor Y. Rojas<sup>13</sup>, Thiago Nogueira<sup>14</sup>, Thérèse Salameh<sup>15</sup>, Min Huang<sup>16</sup>

<sup>1</sup> School of Geosciences, College of Arts and Sciences, University of South Florida, St. Petersburg, FL, USA

<sup>2</sup> NASA Goddard Space Flight Center, Greenbelt, Maryland, USA

<sup>3</sup> Goddard Earth Sciences Technology and Research (GESTAR), Maryland, USA

<sup>4</sup> Earth Sciences Department, Barcelona Supercomputing Center, Barcelona, Spain

<sup>5</sup> Jet Propulsion Laboratory, California Institute of Technology, Pasadena CA

<sup>6</sup> BIRA-IASB, Ringlaan 3 Av. Circulaire, 1180 Brussels, Belgium

<sup>7</sup> Dept. of Atmospheric and Oceanic Science, University of Maryland, College Park, MD USA

<sup>8</sup> Center for Climate and Resilience Research, Department of Geophysics, Faculty of Physical and Mathematical Sciences University of Chile, Chile.

<sup>9</sup> Atmospheric Chemistry Observations and Modeling (ACOM), National Center for Atmospheric Research (NCAR), Boulder CO, USA.

<sup>10</sup> Institute of Energy and Climate Research, IEK-8: Troposphere, Forschungszentrum Jülich, Jülich, Germany.

<sup>11</sup> Universidad San Francisco de Quito USFQ, Instituto de Investigaciones Atmosféricas, Diego de Robles y Av Interoceánica, Quito, Ecuador.

<sup>12</sup> Center for Climate Change Research, Indian Institute of Tropical Meteorology, MoES, Pune, India.

<sup>13</sup> Department of Chemical and Environmental Engineering, Universidad Nacional de Colombia, Bogota, Colombia

<sup>14</sup> University of São Paulo, São Paulo, Brazil

<sup>15</sup> IMT Lille Douai, Institut Mines-Télécom, Univ. Lille, Centre for Energy and Environment, F-59000 Lille, France.

<sup>16</sup> University of Maryland, College Park, MD, USA

Table S 1: List of ozone sonde stations used in the study.

| Station          | Country or region | Latitude | Longitude | Source   | Link                                                                                                                        |
|------------------|-------------------|----------|-----------|----------|-----------------------------------------------------------------------------------------------------------------------------|
| Alert            | Canada            | 82.50    | -62.30    | HEGIFTOM | <a href="https://hegiftom.meteo.be/">https://hegiftom.meteo.be/</a>                                                         |
| Eureka           | Canada            | 80.05    | -86.42    | HEGIFTOM | <a href="https://hegiftom.meteo.be/">https://hegiftom.meteo.be/</a>                                                         |
| Resolute         | Canada            | 74.72    | -97.98    | HEGIFTOM | <a href="https://hegiftom.meteo.be/">https://hegiftom.meteo.be/</a>                                                         |
| Churchill        | Canada            | 58.74    | -94.07    | HEGIFTOM | <a href="https://hegiftom.meteo.be/">https://hegiftom.meteo.be/</a>                                                         |
| Edmonton         | Canada            | 53.55    | -114.10   | HEGIFTOM | <a href="https://hegiftom.meteo.be/">https://hegiftom.meteo.be/</a>                                                         |
| Goose Bay        | Canada            | 53.30    | -60.39    | HEGIFTOM | <a href="https://hegiftom.meteo.be/">https://hegiftom.meteo.be/</a>                                                         |
| Legionowo        | Poland            | 52.40    | 20.97     | HEGIFTOM | <a href="https://hegiftom.meteo.be/">https://hegiftom.meteo.be/</a>                                                         |
| De Bilt          | Netherlands       | 52.10    | 5.18      | HEGIFTOM | <a href="https://hegiftom.meteo.be/">https://hegiftom.meteo.be/</a>                                                         |
| Uccle            | Belgium           | 50.80    | 4.36      | HEGIFTOM | <a href="https://hegiftom.meteo.be/">https://hegiftom.meteo.be/</a>                                                         |
| Kelowna          | Canada            | 49.93    | -119.40   | HEGIFTOM | <a href="https://hegiftom.meteo.be/">https://hegiftom.meteo.be/</a>                                                         |
| Payerne          | Switzerland       | 46.81    | 6.94      | HEGIFTOM | <a href="https://hegiftom.meteo.be/">https://hegiftom.meteo.be/</a>                                                         |
| Yarmouth         | Canada            | 43.87    | -66.11    | HEGIFTOM | <a href="https://hegiftom.meteo.be/">https://hegiftom.meteo.be/</a>                                                         |
| Madrid           | Spain             | 40.45    | -3.72     | HEGIFTOM | <a href="https://hegiftom.meteo.be/">https://hegiftom.meteo.be/</a>                                                         |
| Izaña            | Spain             | 28.30    | -16.48    | HEGIFTOM | <a href="https://hegiftom.meteo.be/">https://hegiftom.meteo.be/</a>                                                         |
| Paramaribo       | Suriname          | 5.81     | -55.21    | HEGIFTOM | <a href="https://hegiftom.meteo.be/">https://hegiftom.meteo.be/</a>                                                         |
| Lauder           | New Zealand       | -45.04   | 169.68    | HEGIFTOM | <a href="https://hegiftom.meteo.be/">https://hegiftom.meteo.be/</a>                                                         |
| Ny-Ålesund       | Norway            | 78.91    | 11.88     | NDACC    | <a href="https://www-air.larc.nasa.gov/missions/ndacc/data.html">https://www-air.larc.nasa.gov/missions/ndacc/data.html</a> |
| Thule            | Greenland         | 76.53    | -68.74    | NDACC    | <a href="https://www-air.larc.nasa.gov/missions/ndacc/data.html">https://www-air.larc.nasa.gov/missions/ndacc/data.html</a> |
| Scoresbysund     | Greenland         | 70.48    | -21.97    | NDACC    | <a href="https://www-air.larc.nasa.gov/missions/ndacc/data.html">https://www-air.larc.nasa.gov/missions/ndacc/data.html</a> |
| Sodankylä        | Finland           | 67.37    | 26.65     | NDACC    | <a href="https://www-air.larc.nasa.gov/missions/ndacc/data.html">https://www-air.larc.nasa.gov/missions/ndacc/data.html</a> |
| Haute Provence   | France            | 43.94    | 5.71      | NDACC    | <a href="https://www-air.larc.nasa.gov/missions/ndacc/data.html">https://www-air.larc.nasa.gov/missions/ndacc/data.html</a> |
| Dumont d'Urville | Antarctica        | -66.67   | 140.00    | NDACC    | <a href="https://www-air.larc.nasa.gov/missions/ndacc/data.html">https://www-air.larc.nasa.gov/missions/ndacc/data.html</a> |
| Neumayer         | Antarctica        | -70.65   | -8.25     | NDACC    | <a href="https://www-air.larc.nasa.gov/missions/ndacc/data.html">https://www-air.larc.nasa.gov/missions/ndacc/data.html</a> |
| McMurdo          | Antarctica        | -77.85   | 166.67    | NDACC    | <a href="https://www-air.larc.nasa.gov/missions/ndacc/data.html">https://www-air.larc.nasa.gov/missions/ndacc/data.html</a> |
| Belgrano         | Antarctica        | -77.87   | -34.62    | NDACC    | <a href="https://www-air.larc.nasa.gov/missions/ndacc/data.html">https://www-air.larc.nasa.gov/missions/ndacc/data.html</a> |

|                       |                           |        |         |        |                                                                                                               |
|-----------------------|---------------------------|--------|---------|--------|---------------------------------------------------------------------------------------------------------------|
| Summit                | Greenland                 | 72.34  | -38.29  | NOAA   | <a href="ftp://ftp.gml.noaa.gov/data/ozwv/Ozonesonde/">ftp://ftp.gml.noaa.gov/data/ozwv/Ozonesonde/</a>       |
| Trinidad Head         | United States             | 40.80  | -124.16 | NOAA   | <a href="ftp://ftp.gml.noaa.gov/data/ozwv/Ozonesonde/">ftp://ftp.gml.noaa.gov/data/ozwv/Ozonesonde/</a>       |
| Boulder ESRL HQ (CO)  | United States             | 39.99  | -105.26 | NOAA   | <a href="ftp://ftp.gml.noaa.gov/data/ozwv/Ozonesonde/">ftp://ftp.gml.noaa.gov/data/ozwv/Ozonesonde/</a>       |
| Huntsville            | United States             | 34.72  | -86.64  | NOAA   | <a href="ftp://ftp.gml.noaa.gov/data/ozwv/Ozonesonde/">ftp://ftp.gml.noaa.gov/data/ozwv/Ozonesonde/</a>       |
| South Pole            | Antarctica                | -90.00 | -169.00 | NOAA   | <a href="ftp://ftp.gml.noaa.gov/data/ozwv/Ozonesonde/">ftp://ftp.gml.noaa.gov/data/ozwv/Ozonesonde/</a>       |
| Wallops Island        | United States             | 37.93  | -75.47  | SHADOZ | <a href="https://tropo.gsfc.nasa.gov/shadoz/Archive.html">https://tropo.gsfc.nasa.gov/shadoz/Archive.html</a> |
| Hanoi                 | Vietnam                   | 21.01  | 105.80  | SHADOZ | <a href="https://tropo.gsfc.nasa.gov/shadoz/Archive.html">https://tropo.gsfc.nasa.gov/shadoz/Archive.html</a> |
| Hilo (HI)             | Northeastern Pacific      | 19.58  | -155.07 | SHADOZ | <a href="https://tropo.gsfc.nasa.gov/shadoz/Archive.html">https://tropo.gsfc.nasa.gov/shadoz/Archive.html</a> |
| Costa Rica            | Costa Rica                | 9.94   | -84.04  | SHADOZ | <a href="https://tropo.gsfc.nasa.gov/shadoz/Archive.html">https://tropo.gsfc.nasa.gov/shadoz/Archive.html</a> |
| Kuala Lumpur          | Malaysia                  | 2.73   | 101.27  | SHADOZ | <a href="https://tropo.gsfc.nasa.gov/shadoz/Archive.html">https://tropo.gsfc.nasa.gov/shadoz/Archive.html</a> |
| San Cristobal         | Galapagos                 | -0.92  | -89.62  | SHADOZ | <a href="https://tropo.gsfc.nasa.gov/shadoz/Archive.html">https://tropo.gsfc.nasa.gov/shadoz/Archive.html</a> |
| Nairobi               | Kenya                     | -1.30  | 36.75   | SHADOZ | <a href="https://tropo.gsfc.nasa.gov/shadoz/Archive.html">https://tropo.gsfc.nasa.gov/shadoz/Archive.html</a> |
| Natal                 | Brazil                    | -6.00  | -35.20  | SHADOZ | <a href="https://tropo.gsfc.nasa.gov/shadoz/Archive.html">https://tropo.gsfc.nasa.gov/shadoz/Archive.html</a> |
| Watakosek             | Java                      | -7.50  | 112.60  | SHADOZ | <a href="https://tropo.gsfc.nasa.gov/shadoz/Archive.html">https://tropo.gsfc.nasa.gov/shadoz/Archive.html</a> |
| Ascension             | South Atlantic            | -7.58  | -14.24  | SHADOZ | <a href="https://tropo.gsfc.nasa.gov/shadoz/Archive.html">https://tropo.gsfc.nasa.gov/shadoz/Archive.html</a> |
| Samoa (Cape Matatula) | Southeastern Pacific      | -14.25 | -170.56 | SHADOZ | <a href="https://tropo.gsfc.nasa.gov/shadoz/Archive.html">https://tropo.gsfc.nasa.gov/shadoz/Archive.html</a> |
| Fiji                  | South Pacific             | -18.13 | 178.40  | SHADOZ | <a href="https://tropo.gsfc.nasa.gov/shadoz/Archive.html">https://tropo.gsfc.nasa.gov/shadoz/Archive.html</a> |
| La Réunion            | Southwestern Indian Ocean | -21.08 | 55.38   | SHADOZ | <a href="https://tropo.gsfc.nasa.gov/shadoz/Archive.html">https://tropo.gsfc.nasa.gov/shadoz/Archive.html</a> |
| Irene                 | South Africa              | -25.90 | 28.22   | SHADOZ | <a href="https://tropo.gsfc.nasa.gov/shadoz/Archive.html">https://tropo.gsfc.nasa.gov/shadoz/Archive.html</a> |
| Idabel                | United States             | 33.90  | -94.75  | TOPP   | <a href="http://www.ruf.rice.edu/%7Eozone/">http://www.ruf.rice.edu/%7Eozone/</a>                             |
| Houston               | United States             | 29.72  | -95.34  | TOPP   | <a href="http://www.ruf.rice.edu/%7Eozone/">http://www.ruf.rice.edu/%7Eozone/</a>                             |

|                  |                |        |        |       |                                                                                                     |
|------------------|----------------|--------|--------|-------|-----------------------------------------------------------------------------------------------------|
| Quito            | Ecuador        | -0.20  | -78.44 | USFQ  | <a href="https://observaciones-ia.usfq.edu.ec/">https://observaciones-ia.usfq.edu.ec/</a>           |
| Lerwick          | United Kingdom | 60.13  | -1.10  | WOUDC | <a href="https://woudc.org/data/explore.php?lang=en">https://woudc.org/data/explore.php?lang=en</a> |
| Lindenberg       | Germany        | 52.21  | 14.12  | WOUDC | <a href="https://woudc.org/data/explore.php?lang=en">https://woudc.org/data/explore.php?lang=en</a> |
| Valentia         | Ireland        | 51.94  | -10.25 | WOUDC | <a href="https://woudc.org/data/explore.php?lang=en">https://woudc.org/data/explore.php?lang=en</a> |
| Prague           | Czech Republic | 50.01  | 14.45  | WOUDC | <a href="https://woudc.org/data/explore.php?lang=en">https://woudc.org/data/explore.php?lang=en</a> |
| Hohenpeissenberg | Germany        | 47.80  | 11.01  | WOUDC | <a href="https://woudc.org/data/explore.php?lang=en">https://woudc.org/data/explore.php?lang=en</a> |
| Sapporo          | Japan          | 43.06  | 141.33 | WOUDC | <a href="https://woudc.org/data/explore.php?lang=en">https://woudc.org/data/explore.php?lang=en</a> |
| Tateno (Tsukuba) | Japan          | 36.10  | 140.13 | WOUDC | <a href="https://woudc.org/data/explore.php?lang=en">https://woudc.org/data/explore.php?lang=en</a> |
| Naha             | Japan          | 26.20  | 127.68 | WOUDC | <a href="https://woudc.org/data/explore.php?lang=en">https://woudc.org/data/explore.php?lang=en</a> |
| Hong Kong        | China          | 22.31  | 114.17 | WOUDC | <a href="https://woudc.org/data/explore.php?lang=en">https://woudc.org/data/explore.php?lang=en</a> |
| Broadmeadows     | Australia      | -37.69 | 144.95 | WOUDC | <a href="https://woudc.org/data/explore.php?lang=en">https://woudc.org/data/explore.php?lang=en</a> |
| Macquarie Island | Australia      | -54.50 | 158.94 | WOUDC | <a href="https://woudc.org/data/explore.php?lang=en">https://woudc.org/data/explore.php?lang=en</a> |
| Marambio         | Antarctica     | -64.24 | -56.62 | WOUDC | <a href="https://woudc.org/data/explore.php?lang=en">https://woudc.org/data/explore.php?lang=en</a> |
| Davis            | Australia      | -68.58 | 77.97  | WOUDC | <a href="https://woudc.org/data/explore.php?lang=en">https://woudc.org/data/explore.php?lang=en</a> |
| Syowa            | Antarctica     | -69.00 | 39.58  | WOUDC | <a href="https://woudc.org/data/explore.php?lang=en">https://woudc.org/data/explore.php?lang=en</a> |

### CO MOPITT and CAM-chem simulation:

We compare simulations made by the Community Atmosphere Model with chemistry (CAM-chem) of the Community Earth System Model (CESM) version 2.1. The model is run at nominal  $1^\circ \times 1^\circ$ , with comprehensive tropospheric and stratospheric chemistry, and includes nudging to the MERRA-2 reanalysis (Danabasoglu et al., 2020; Emmons et al., 2020). A baseline simulation uses the daily Quick-Fire Emissions Dataset (QFED) and monthly anthropogenic inventory from CAMS-GLOB-ANTv5.1 (Soulié et al., 2023). The anthropogenic CO emissions were replaced by the Community Emissions Data System version 2 or CEDSv2 (McDuffie et al., 2020).

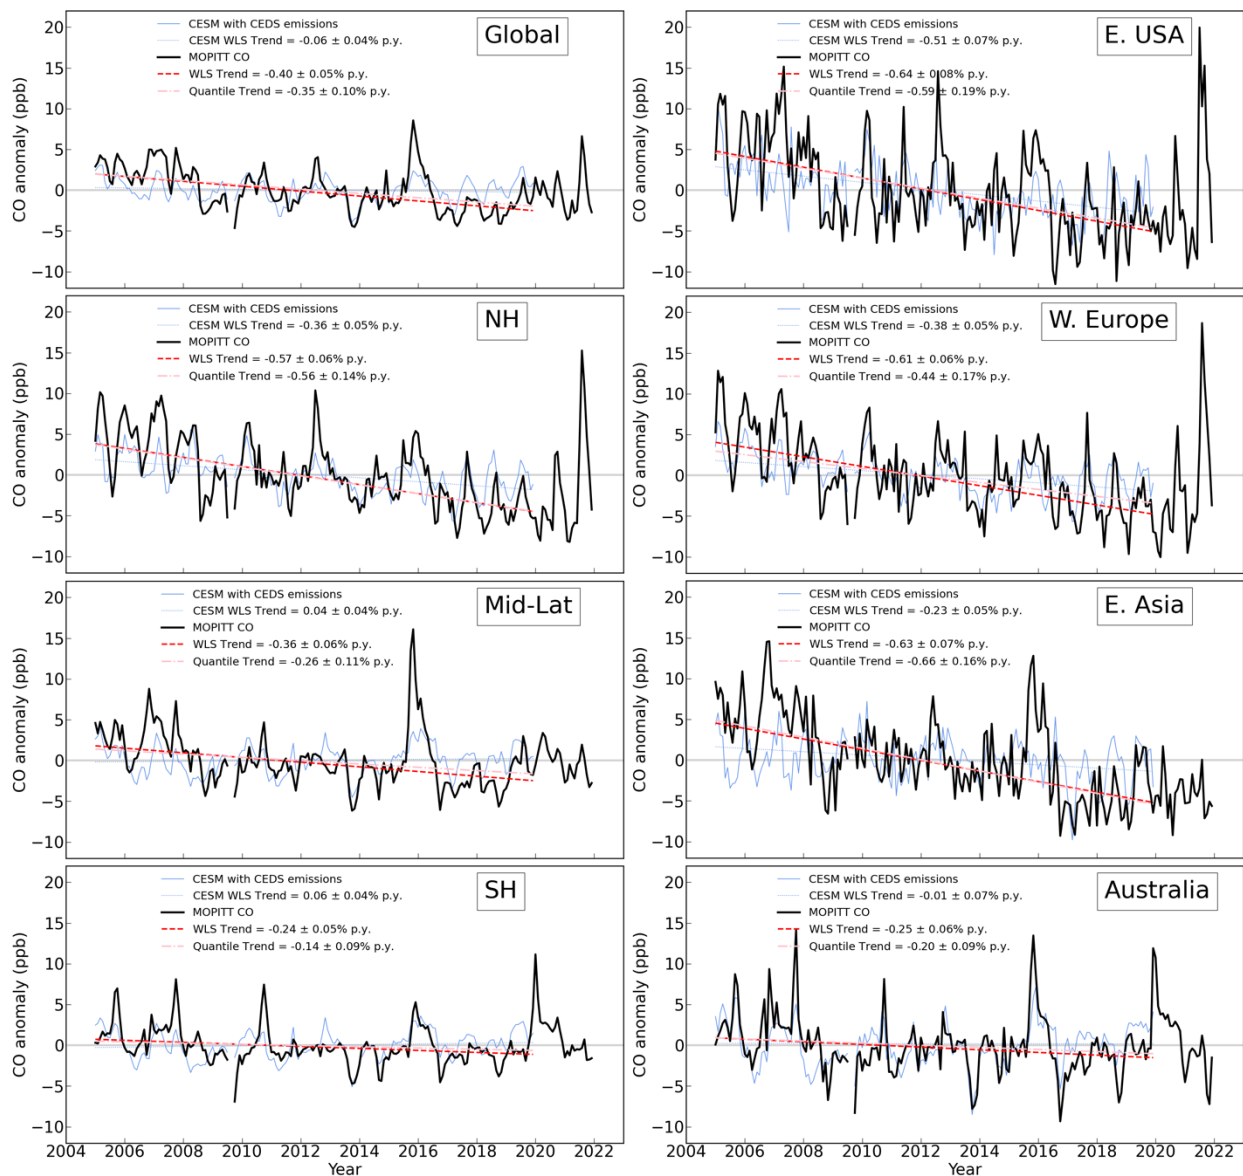

Figure S 1: MOPITT monthly average CO anomalies in column average volume mixing ratio (VMR), 2005-2021 (black). Updated dataset based on Buchholz et al. (2021). Data is Level 3, monthly average daytime observations, using version 9 joint NIR/TIR retrievals. Regions are defined in Figures 10 and 11. Trends are calculated on anomalies 2005-2019. The weighted Least Squares trend (red) is weighted by the monthly regional standard deviation. The quantile regression trend is also shown (pink). The quantile regression trend is also shown (pink). Grey line indicates zero. CESM simulation results are shown as a comparison. Model output was

convolved with the MOPITT averaging kernel prior to calculating regional month average CO anomalies (blue solid line) and WLS trends (blue dotted line).

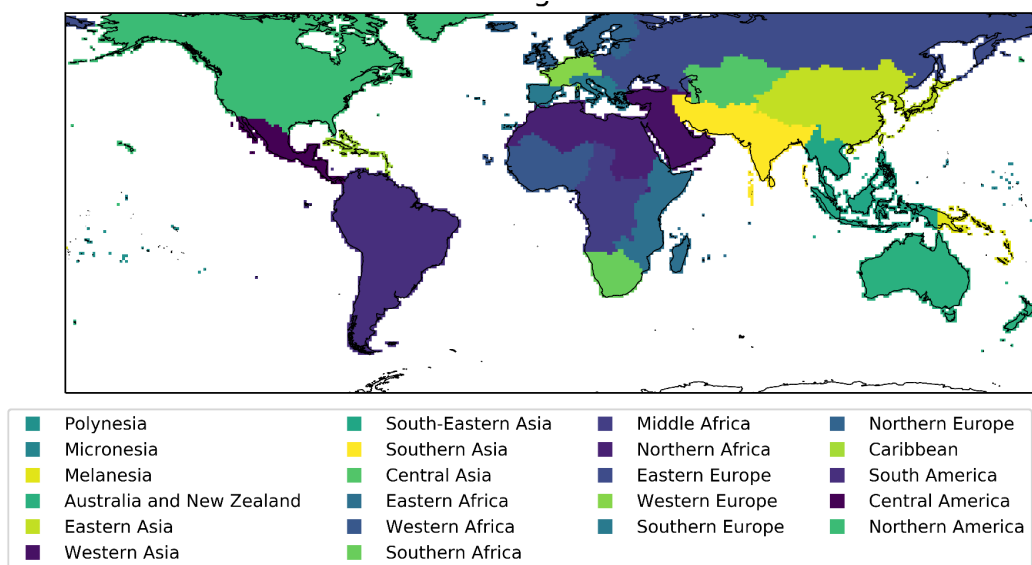

Figure S 2: Map of the regions used for computing the regional OMI QA4ECV TrC-NO<sub>2</sub> and TrC-HCHO trends.



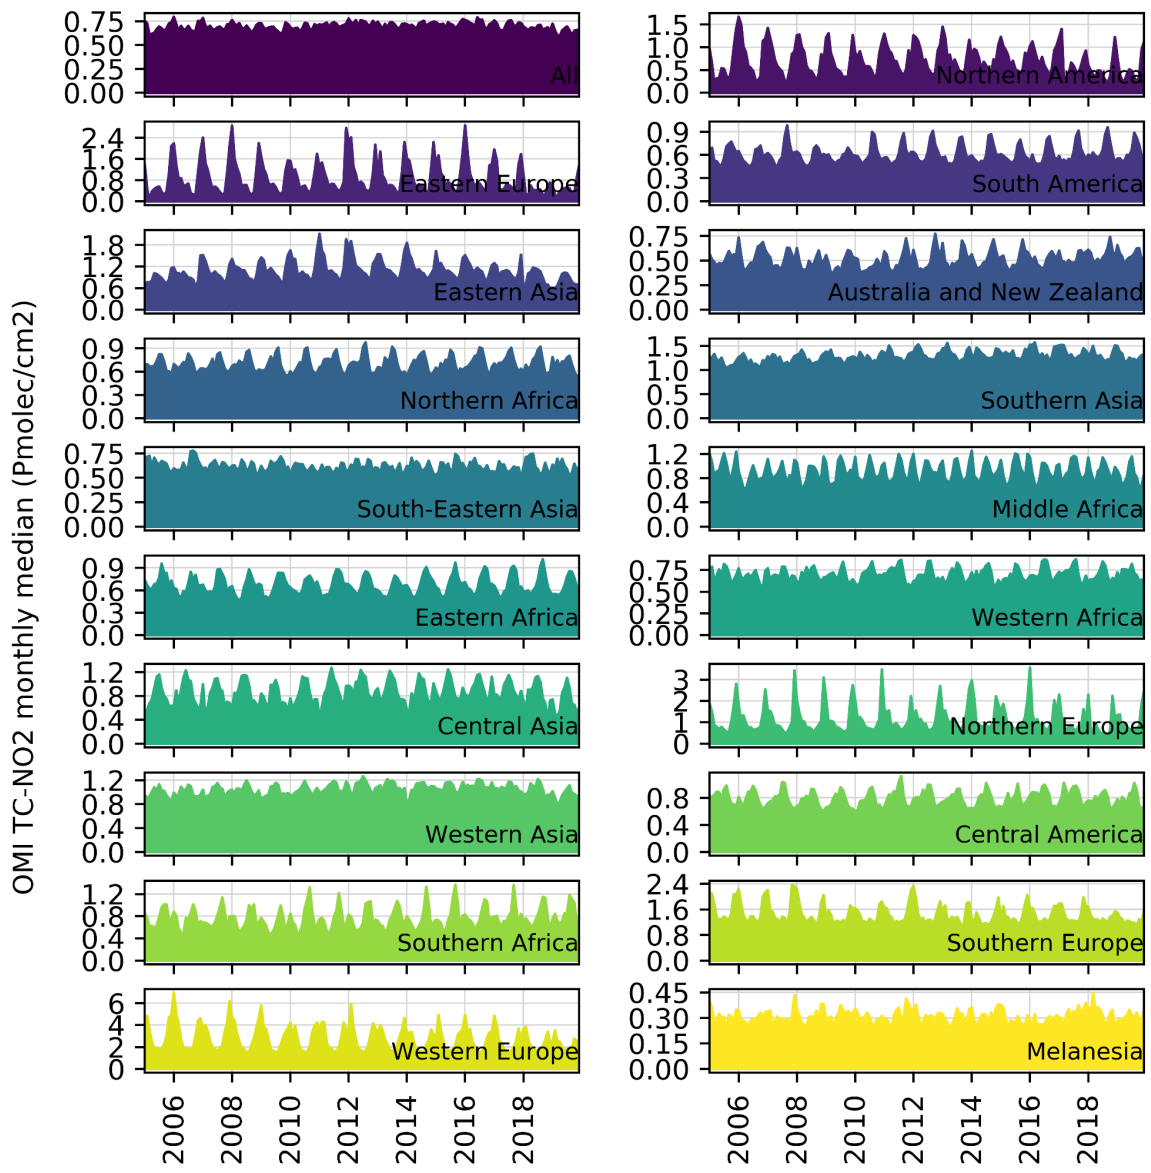

Figure S 3: Monthly regional time series of OMI QA4ECV TrC-NO2.

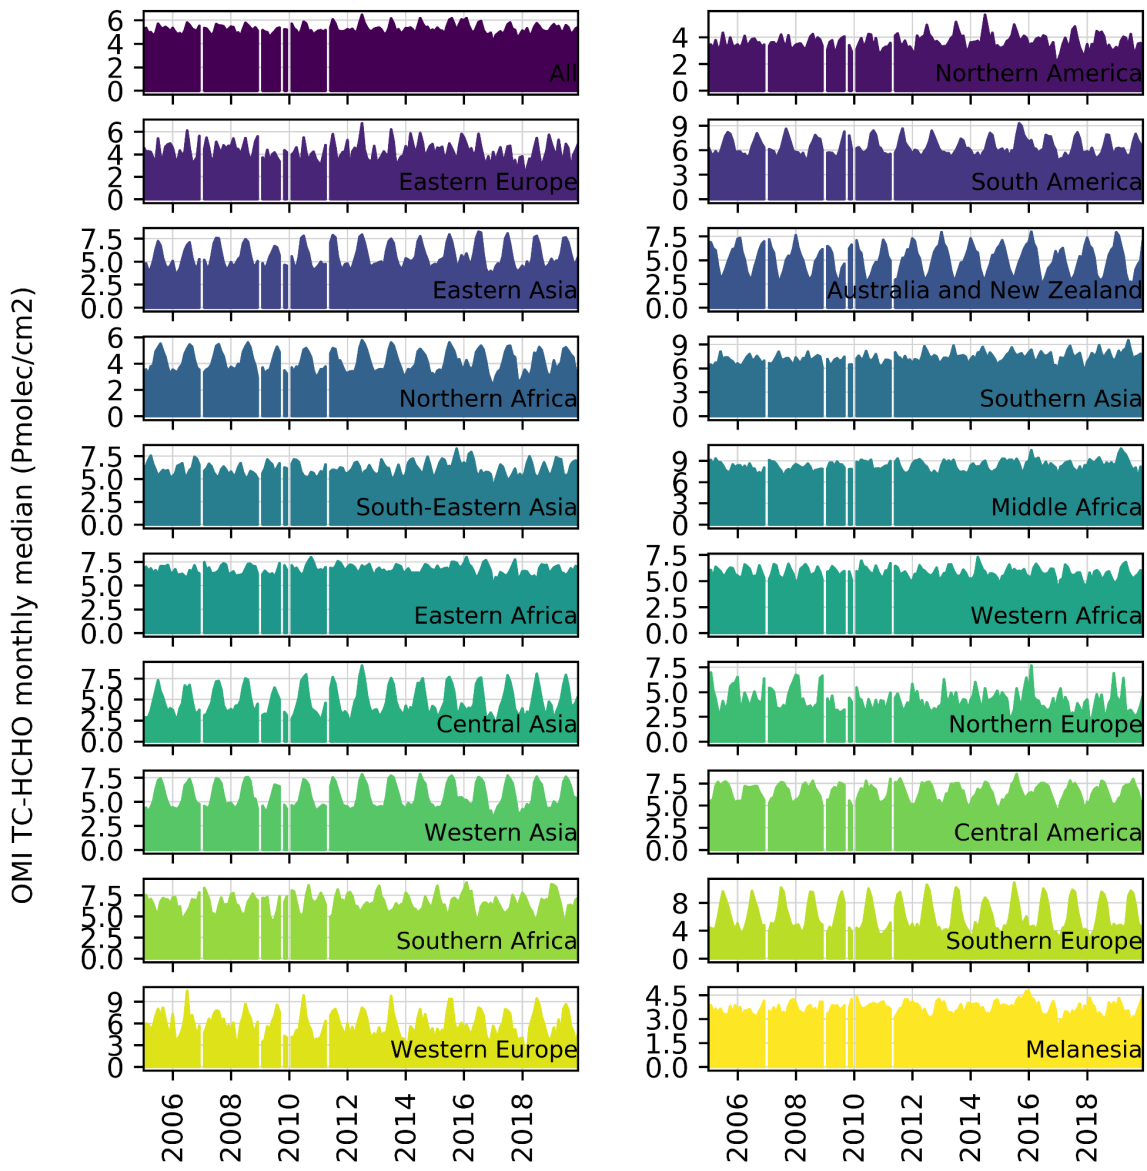

Figure S 4: Monthly regional time series of OMI QA4ECV TrC-HCHO.

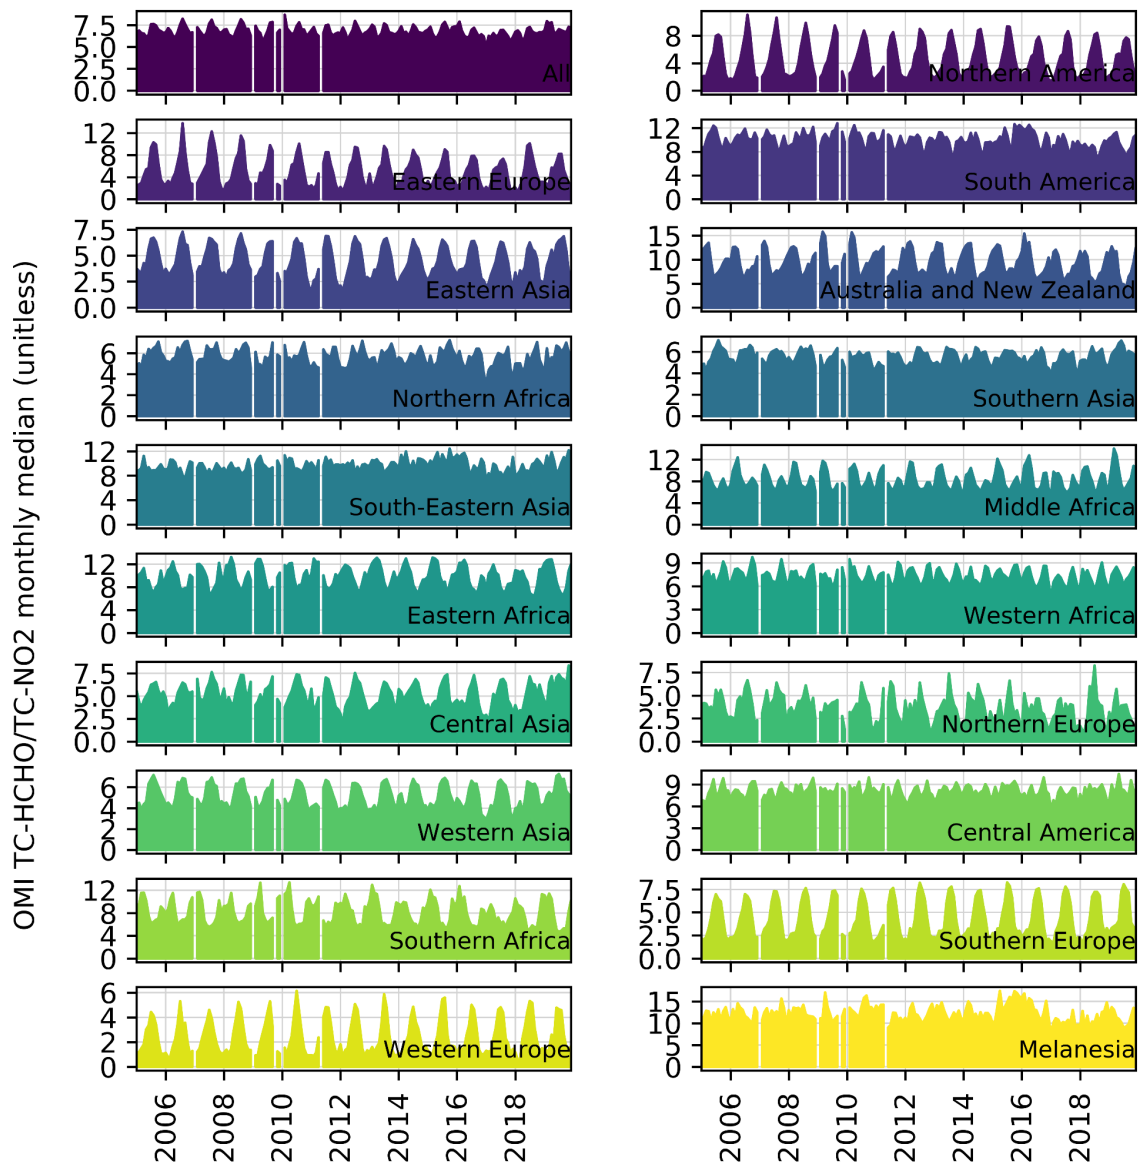

Figure S 5: Monthly regional time series of OMI QA4ECV TrC-HCHO/NO2.
